# Supplementary material
Source: PubMed Central journal article supplement (PMC3971031)
Supplement: supp_130523_case-farrell2-1-at.pdf [file supp_130523_case-farrell2-1-at.pdf]

| Appendix 1: History of medication experience                                                                                                                                                |                                      |                        |                                                                                                                                                                        |        |        |        |
|---------------------------------------------------------------------------------------------------------------------------------------------------------------------------------------------|--------------------------------------|------------------------|------------------------------------------------------------------------------------------------------------------------------------------------------------------------|--------|--------|--------|
| Medication                                                                                                                                                                                  | Reason for use (if known)            | Duration (if known)    | Knowledge, efficacy, compliance, goals, safety assessment*                                                                                                             |        |        |        |
| Telmisartan 80 mg/d                                                                                                                                                                         | CAD; MI/angioplasty<br>15 yr earlier | ?                      | BP, mm Hg                                                                                                                                                              | Day 1  | Day 2  | Day 3  |
|                                                                                                                                                                                             |                                      |                        | • Lying:                                                                                                                                                               | 115/55 | 118/61 | 127/70 |
|                                                                                                                                                                                             |                                      |                        | • Standing:                                                                                                                                                            | 83/42  | 102/54 | 97/64  |
| Metoprolol 50 mg/d                                                                                                                                                                          | CAD; MI/angioplasty<br>15 yr earlier | 15 yr                  | <ul style="list-style-type: none"> <li>• Reported feeling weak and having little energy</li> <li>• ECG on admission showed sinus bradycardia (52 beats/min)</li> </ul> |        |        |        |
| Escitalopram 10 mg/d                                                                                                                                                                        | Depression                           | ~ 2 mo                 | <ul style="list-style-type: none"> <li>• Stated that medication is helping; appetite improving in last week</li> </ul>                                                 |        |        |        |
| Lorazepam 1 mg at bedtime as needed                                                                                                                                                         | Insomnia                             | Within last several mo | <ul style="list-style-type: none"> <li>• Reported taking medication nightly, but still takes 1.5–2 h to fall asleep; naps up to 6 h during the day</li> </ul>          |        |        |        |
| Tamsulosin CR 0.4 mg at bedtime                                                                                                                                                             | Nocturia                             | ~ 2 yr                 | <ul style="list-style-type: none"> <li>• Stated that urination is easier but nocturia not improved</li> </ul>                                                          |        |        |        |
| Pantoprazole 40 mg twice daily                                                                                                                                                              | GI bleed 7 mo earlier                | 7 mo                   | <ul style="list-style-type: none"> <li>• No current symptoms of ulcer or reflux</li> </ul>                                                                             |        |        |        |
| Prednisone 5 mg twice daily                                                                                                                                                                 | Bullous pemphigoid                   | ~ 2 yr                 | <ul style="list-style-type: none"> <li>• Prescribed by dermatologist; symptoms currently controlled</li> </ul>                                                         |        |        |        |
| Loperamide 1 mg as needed                                                                                                                                                                   | Diarrhea                             | ~ 2 mo                 | <ul style="list-style-type: none"> <li>• Reported having diarrhea every 4–5 d; relieved with loperamide</li> </ul>                                                     |        |        |        |
| Note: BP = blood pressure, CAD = coronary artery disease, CR = controlled release, ECG = electrocardiogram, GI = gastrointestinal, MI = myocardial infarction.<br>*No known drug allergies. |                                      |                        |                                                                                                                                                                        |        |        |        |
