# Supplementary material
Source: PubMed Central journal article supplement (PMC3971031)
Supplement: supp_130523_case-farrell2-2-at.pdf [file supp_130523_case-farrell2-2-at.pdf]

| <b>Appendix 2: Intervention timeline</b>                        |                                                                                                                                                                                                                                                                                                                                       |
|-----------------------------------------------------------------|---------------------------------------------------------------------------------------------------------------------------------------------------------------------------------------------------------------------------------------------------------------------------------------------------------------------------------------|
| Initial pill burden: 9 pills/d<br>Initial no. of medications: 8 |                                                                                                                                                                                                                                                                                                                                       |
| Week 1                                                          | <ul style="list-style-type: none"> <li>• Start vitamin D 1000 IU/d</li> <li>• Stop lorazepam 1 mg at bedtime</li> <li>• Start lorazepam 0.5 mg at bedtime (when needed)</li> </ul>                                                                                                                                                    |
| Week 2                                                          | <ul style="list-style-type: none"> <li>• Start vitamin B<sub>12</sub> 1000 µg/d</li> <li>• Stop pantoprazole</li> <li>• Start rabeprazole 20 mg/d</li> <li>• Decrease metoprolol dose to 25 mg/d</li> <li>• Stop prednisone 5 mg 2 times/d</li> <li>• Start prednisone 7.5 mg/d</li> </ul>                                            |
| Week 4                                                          | <ul style="list-style-type: none"> <li>• Decrease dose of escitalopram to 5 mg/d</li> <li>• Decrease dose of lorazepam to 0.25 mg at bedtime (when needed)</li> <li>• Increase prednisone dose to 5 mg 2 times/d</li> <li>• Start psyllium 1 capsule/d (increase as needed) with 250 mL water (no longer using loperamide)</li> </ul> |
| Week 6                                                          | <ul style="list-style-type: none"> <li>• Decrease dose of rabeprazole to 10 mg/d</li> <li>• Decrease dose of metoprolol to 12.5 mg/d</li> </ul>                                                                                                                                                                                       |
| Week 7                                                          | <ul style="list-style-type: none"> <li>• Stop lorazepam</li> </ul>                                                                                                                                                                                                                                                                    |
| Week 8                                                          | <ul style="list-style-type: none"> <li>• Stop metoprolol</li> <li>• Stop escitalopram</li> <li>• Decrease dose of telmisartan to 40 mg/d</li> <li>• Stop psyllium capsules</li> <li>• Start psyllium powder 15 mL/d in 250 mL water</li> </ul>                                                                                        |
| Week 10                                                         | <ul style="list-style-type: none"> <li>• Decrease dose of telmisartan to 20 mg/d</li> </ul>                                                                                                                                                                                                                                           |
| Week 11                                                         | <ul style="list-style-type: none"> <li>• Stop rabeprazole</li> </ul>                                                                                                                                                                                                                                                                  |
| Week 12                                                         | <ul style="list-style-type: none"> <li>• No medication changes</li> </ul>                                                                                                                                                                                                                                                             |
| Final pill burden: 7 pills/d<br>Final no. of medications: 6     |                                                                                                                                                                                                                                                                                                                                       |
