# Supplementary material
Source: PubMed Central journal article supplement (PMC3971031)
Supplement: supp_130523_case-farrell2-3-at.pdf [file supp_130523_case-farrell2-3-at.pdf]

### Appendix 3: Teaching case for interprofessional group discussion

## Revisiting medication use in a frail 93-year-old man experiencing possible adverse effects

Barbara Farrell BScPhm PharmD, Anne Monahan MD, Wade Thompson BScPhm

This teaching case includes instructions and worksheets to facilitate interprofessional group discussion about the management of polypharmacy.

A 93-year-old man was referred to a geriatric day hospital for assessment of falls, mobility, mood and function. A month earlier, he had presented to a local hospital following a fall that resulted in lacerations to his right arm. At that time, he reported worsening balance and frequent falls over several months, as well as low mood. Comorbidities included coronary artery disease with previous myocardial infarction and angioplasty 15 years earlier, carotid endarterectomy, hypertension, vertebral fractures, bullous pemphigoid and osteoporosis. Most instrumental activities of daily living (e.g., laundry, food preparation) were managed by staff at his retirement home. The patient maintained responsibility for taking his medications from pharmacy-prepared blister packs; his daughter described his compliance as good (see Box 1 for the list of medications).

At presentation, additional problems of low blood pressure, dizziness, daytime sedation, low energy, diarrhea, vitamin deficiencies and hyponatremia were highlighted. The patient accepted a 12-week admission to the geriatric day hospital, and twice-weekly transportation was organized.

At his first few visits, orthostatic hypotension was noted (on 2 occasions, his blood pressure dropped from 115/55 mm Hg supine to 83/42 mm Hg standing, and from 127/70 mm Hg supine to 97/64 mm Hg standing) and was associated with dizziness when the patient stood up quickly or bent forward. He described sleep as good, although he reported taking 1.5–2 hours to fall asleep and a need to go to the bathroom twice nightly. He had little energy and napped up to 6 hours daily. Low energy and anhedonia meant he had given up several activities, and he

had lost weight because of a poor appetite. Despite this, he felt he was not depressed. He reported bouts of diarrhea every 4–5 days starting in the last 2–3 months and 4–5 episodes of fecal incontinence over this period. Blood work showed vitamin B<sub>12</sub> deficiency (189 pmol/L; sufficient > 220 pmol/L), vitamin D deficiency (49 nmol/L; sufficient > 76 nmol/L), hyponatremia (sodium 132 mmol/L; normal 135–145 mmol/L) and a slightly low calcium level of 2.15 mmol/L (normal 2.20–2.65 mmol/L). Creatinine clearance was calculated as 30 mL/min (Cockcroft–Gault equation with adjusted body weight).

An interprofessional care plan was developed to address these issues. The pharmacist at the geriatric day hospital conducted a medication assessment, which included a 45-minute comprehensive interview with the patient and chart review. Each medication was assessed for indication, effectiveness, safety, compliance and patient understanding.<sup>1</sup> Results of the initial medication assessment are outlined in Appendix 3A.

**Stop here:** If you are using this case report for group discussion, see the end of the article (Appendix 3B) for instructions, discussion questions and a blank worksheet. You may print out the case description and Appendix 3A for discussion before reading about the results of the medication assessment.

#### KEY POINTS

- All older people should have their medications reviewed regularly to assess ongoing indications and potential adverse effects and to minimize pill burden.
- A new symptom or problem may be an adverse effect of one or more medications.
- Age-appropriate evidence-based targets can help to determine the need for ongoing treatment.
- Tapering of doses and discontinuation of medications can be considered to determine whether a drug is still required.

#### Competing interests:

Barbara Farrell received an honorarium from the journal *Pharmacy Practice* for an article on polypharmacy; she also received an honorarium from RxFiles for preparing and presenting workshops on the management of polypharmacy. No competing interests were declared by Anne Monahan or Wade Thompson.

This article has been peer reviewed.

#### Correspondence to:

Barbara Farrell,  
bfarrell@bruyere.org

*CMAJ* 2014. DOI:10.1503/cmaj.130523

Signs and symptoms were assessed to determine potential drug-related causes.<sup>2</sup> The complete medication assessment and care plan are outlined in Box 2.

**Stop here:** If you are using this case report for group discussion, see the end of the article (Appendix 3C) for instructions, discussion questions and a blank worksheet. You may print out the case description and Box 2 for

discussion before reading about how the care plan was implemented.

Throughout the admission, several changes were made to the patient's medications (Appendix 3D). The patient participated in balance, strength and mobility exercises with the hospital's physiotherapist, focusing particularly on gait training with and without aids. His Berg Balance score improved from 42 to 54 out of 56 (a 12-point improvement is associated with a clinically significant reduction in risk of falls and improvement in function).<sup>3,4</sup> His 6-minute walk test improved from 240 m to 390 m (a 50-m improvement is estimated to be clinically significant for most patients).<sup>5</sup> His confidence in climbing stairs improved substantially. The patient received fall-prevention education from the occupational therapist one on one and in group classes. No further falls were reported during the 12-week admission period.

The patient's mood improved following supportive counselling from the social worker and increased social interaction. His appetite and energy levels increased, and he resumed old activities. His diarrhea resolved. His blood pressure im-

| Box 1: Initial list of medications  |                                       |
|-------------------------------------|---------------------------------------|
| Medication, dosage                  | Reason for use, if known              |
| Telmisartan 80 mg/d                 | CAD/MI (15 yr earlier)                |
| Metoprolol 50 mg/d                  | CAD/MI (15 yr earlier)                |
| Escitalopram 10 mg/d                | Depression                            |
| Lorazepam 1 mg at bedtime as needed | Insomnia                              |
| Tamsulosin CR 0.4 mg at bedtime     | Nocturia                              |
| Pantoprazole 40 mg twice daily      | Gastrointestinal bleed (7 mo earlier) |
| Prednisone 5 mg twice daily         | Bullous pemphigoid                    |
| Loperamide 1 mg as needed           | Diarrhea                              |

Note: CAD = coronary artery disease, CR = controlled release, MI = myocardial infarction.

| Box 2: Complete assessment of medications for potential drug-related problems and resulting medication care plan                                                                                                                                        |                                                                                                                                                                                                                                                                                                                                                                                   |                                                                                                                                                                                                                                                           |
|---------------------------------------------------------------------------------------------------------------------------------------------------------------------------------------------------------------------------------------------------------|-----------------------------------------------------------------------------------------------------------------------------------------------------------------------------------------------------------------------------------------------------------------------------------------------------------------------------------------------------------------------------------|-----------------------------------------------------------------------------------------------------------------------------------------------------------------------------------------------------------------------------------------------------------|
| Potential drug-related problem                                                                                                                                                                                                                          | Action plan                                                                                                                                                                                                                                                                                                                                                                       | Monitoring (by team)                                                                                                                                                                                                                                      |
| Diarrhea and hyponatremia<br>• May be contributed to by:<br>- Escitalopram (other than low energy, patient has no major depressive symptoms)<br>- Pantoprazole (likely no longer needed given gastrointestinal bleed was 7 mo earlier)<br>- Telmisartan | 1. Decrease escitalopram to 5 mg/d for 2–4 wk, then stop<br>2. Stop pantoprazole and start rabeprazole 20 mg/d for 2 wk<br>3. Decrease rabeprazole dose to 10 mg/d for 2–4 wk, then stop<br>4. Use calcium carbonate or alginate or low-dose ranitidine as needed for rebound heartburn<br>5. Decrease telmisartan dose gradually to 40 mg daily, then to 20 mg daily if possible | • Bowel movements, stool consistency, need for loperamide<br>• Mood<br>• Withdrawal effects of SSRI discontinuation (e.g., sweating, nausea, insomnia, tremor)<br>• Rebound heartburn for 2–4 wk<br>• Blood pressure target: 120/60 mm Hg to 150/90 mm Hg |
| Orthostatic hypotension and dizziness<br>• May be contributed to by:<br>- Metoprolol (no longer required given MI was 15 yr earlier and no other compelling indications)<br>- Telmisartan                                                               | 1. Decrease metoprolol to 25 mg/d for 2 wk, then to 12.5 mg/d for 1 wk, then stop<br>2. If blood pressure is still below target range, reduce telmisartan dose (see tapering plan above)                                                                                                                                                                                          | • Angina, tachycardia<br>• Orthostatic hypotension, dizziness<br>• Blood pressure target: 120/60 mm Hg to 150/90 mm Hg                                                                                                                                    |
| Frequent falls and daytime fatigue and sleeping<br>• May be contributed to by lorazepam                                                                                                                                                                 | Decrease lorazepam to 0.5 mg at bedtime for 2 wk, then to 0.25 mg at bedtime for 2 wk, then stop                                                                                                                                                                                                                                                                                  | • Sleep<br>• Anxiety, tremor                                                                                                                                                                                                                              |
| Vitamin D deficiency (49 nmol/L) and increased risk of falls                                                                                                                                                                                            | Start vitamin D 1000 IU/d                                                                                                                                                                                                                                                                                                                                                         |                                                                                                                                                                                                                                                           |
| Vitamin B <sub>12</sub> deficiency (189 pmol/L)                                                                                                                                                                                                         | Start vitamin B <sub>12</sub> 1000 µg/d                                                                                                                                                                                                                                                                                                                                           |                                                                                                                                                                                                                                                           |
| Risk of adverse effects with prednisone                                                                                                                                                                                                                 | Consider slowly tapering prednisone dose (e.g., from 5 mg twice daily to 7.5 mg once daily for 1 mo, then to 5 mg once daily for 1 mo, and so on)                                                                                                                                                                                                                                 |                                                                                                                                                                                                                                                           |

Note: MI = myocardial infarction, SSRI = selective serotonin reuptake inhibitor.

**Box 3: Medication schedule at discharge****In the morning**

- Telmisartan 20 mg
- Prednisone 5 mg
- Vitamin D 1000 IU
- Vitamin B<sub>12</sub> 1000 µg
- Psyllium 15 mL

**At supper**

- Prednisone 5 mg

**At bedtime**

- Tamsulosin CR 0.4 mg

CR = controlled release.

proved, and he no longer had dizziness; the nurse provided strategies to manage symptoms of orthostatic hypotension should they occur again. A final medication list is presented in Box 3.

## Discussion

As people reach their 80s and 90s, regular reviews of their medications are important to assess ongoing indications and potential adverse effects and to minimize pill burden. A new symptom or problem may be an adverse effect of one or more medications.<sup>6</sup> Recognizing and addressing the contribution of a drug to a symptom may prevent prescribing cascades, whereby new drugs are given to treat an adverse effect instead of stopping the drug causing the effect. Reviewing the indications and evidence for continuing long-standing drugs, and weighing the benefits against the risk of adverse events, can reduce the number of medications a patient is taking. Figure 1 illustrates the interplay among the patient's medications and the possible effects on his diarrhea, dizziness and risk of falls.

### Diarrhea and hyponatremia

Diarrhea is a common problem for older people and can have a strong negative impact on their quality of life and function.<sup>7</sup> Antibiotics, selective serotonin reuptake inhibitors (SSRIs), proton pump inhibitors and angiotensin-receptor blockers have all been shown to increase the risk of diarrhea in older patients.<sup>7</sup> Hyponatremia has also been associated with several SSRIs, a problem that occurs predominantly in older people.<sup>8</sup>

The onset of our patient's diarrhea was consistent with the initiation of escitalopram for the treatment of depression about 2–3 months before his admission to the geriatric day hospital. Hyponatremia may have been caused or worsened by the escitalopram use, or exacerbated by the diarrhea. In light of these safety concerns, the drug was tapered and eventually stopped, during which the

patient was monitored for mood changes and signs of adverse withdrawal events, in this case SSRI discontinuation syndrome (e.g., anxiety, insomnia, irritability, headache, dizziness and fatigue).

High-dose pantoprazole treatment was being taken following a gastrointestinal bleed secondary to naproxen use 7 months before presentation. Treatment with a proton pump inhibitor for this indication usually does not exceed 8 weeks and need not be lifelong if the offending nonsteroidal anti-inflammatory drug (NSAID) is stopped.<sup>9</sup> Naproxen had been stopped following the gastrointestinal bleed, and the patient had no ongoing reflux or symptoms of a peptic ulcer. Evidence shows that corticosteroids do not increase the risk of peptic ulceration unless NSAIDs are being taken concomitantly.<sup>10</sup> Thus, pantoprazole was considered to be no longer necessary and was switched to low-dose rabeprazole (the only low-dose proton pump inhibitor covered by the provincial formulary without a special code), which was then tapered and eventually stopped. Two minor instances of expected rebound heartburn<sup>11</sup> were managed with calcium carbonate.

Telmisartan may have also been contributing to the patient's diarrhea. Given the hypotension that was observed (discussed in the next section), the dose was reduced.

Following these medication changes, the patient's bowel symptoms improved to the point where he no longer reported diarrhea or episodes of fecal incontinence and loperamide was no longer needed. Psyllium was started to provide bulk for occasional loose stools. The patient

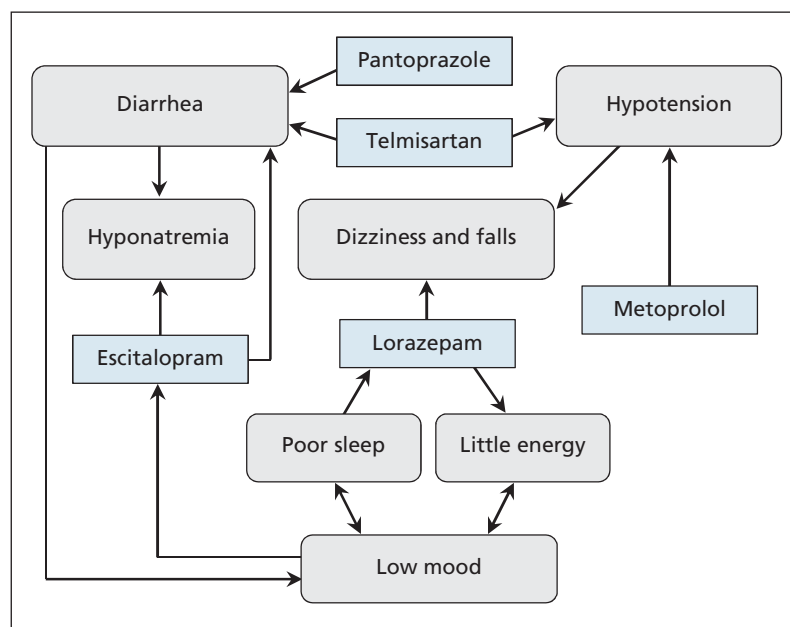

**Figure 1:** Interplay among the medications of a 93-year-old man referred to a geriatric day hospital and their possible effects on his diarrhea, dizziness and risk of falls.

reported normal bowel movements by the time of discharge. His mood was stable during the tapering of the escitalopram and improved during his visits to the geriatric day hospital, even after stopping the escitalopram.

### Hypotension, dizziness and falls

Both metoprolol and telmisartan may have been contributing to the patient's hypotension, dizziness and falls. The hypotension may have been a major factor contributing to his falls, but it also was of concern because low systolic pressure is associated with increased cardiovascular mortality among patients over 85.<sup>12</sup> A target range of 120/60 mm Hg to 150/90 mm Hg was established to guide treatment.

Because the patient's myocardial infarction had occurred 15 years earlier, without subsequent angina or other compelling indications for  $\beta$ -blocker therapy, such as heart failure or atrial fibrillation, the benefit of continuing the metoprolol treatment was questioned. The optimal duration of  $\beta$ -blocker therapy following myocardial infarction is not well established, because there is limited evidence to guide recommendations beyond 2 years of treatment. A large meta-analysis investigating  $\beta$ -blocker use for an average of 1.4 years after myocardial infarction reported a significant reduction in mortality over this time (number needed to treat for 2 yr to prevent 1 death was 42).<sup>13</sup> A more recent observational study followed a cohort of patients for an average of 44 months after myocardial infarction. Beyond 2 years of follow-up, no significant difference in cardiovascular-related death, nonfatal myocardial infarction or nonfatal stroke was seen among patients taking a  $\beta$ -blocker compared with those not taking one.<sup>14</sup>

Because of safety concerns regarding hypotension (with attendant cardiovascular risks), dizziness and falls, we decided to taper and stop the metoprolol. Following its discontinuation, we monitored the patient's blood pressure and heart rate and watched for any rebound angina and common adverse withdrawal events associated with  $\beta$ -blockers (e.g., tachycardia).<sup>15</sup> The patient did not experience rebound angina or tachycardia; however, his blood pressure was still below target, so we gradually decreased the dose of telmisartan from 80 to 20 mg/d, also taking into account the drug's possible contribution to diarrhea. The patient's blood pressure subsequently rose to within target range (e.g., 132/70 mm Hg) by discharge.

Because of the increased risk of injurious falls with benzodiazepine use among community-dwelling people over 80 years old,<sup>16</sup> we identified lorazepam as a possible contributor to the patient's falls and dizziness as well as his daytime

sedation. He had started taking lorazepam 1 mg at bedtime several months before coming to the geriatric day hospital and noted worsening balance and more falls over this time. We slowly tapered<sup>17</sup> and stopped the lorazepam over 7 weeks, with no worsening of his sleep, no rebound insomnia or adverse withdrawal events reported.

Vitamin D supplementation was started, given the patient's deficiency and the potential for vitamin D to reduce the risk of falls.<sup>18</sup>

With our interprofessional approach to falls prevention and these medication changes, the patient's dizziness resolved and no further falls were reported.

### Osteoporosis

Long-term adverse effects of corticosteroids are well-documented and include osteoporosis and diabetes.<sup>19</sup> It was not clear whether the patient still needed daily prednisone treatment to manage his bullous pemphigoid. However, following a trial decrease in the dose from 5 mg twice daily to 7.5 mg once daily, the patient reported a worsening of his symptoms and marked itchiness of his back; the original dosage was reinstated. Treatment with a bisphosphonate was considered owing to the long-term corticosteroid use; however, it was not started because of the patient's low renal function and advanced age; this decision was deferred for discussion with his family physician. Although vitamin D supplementation was started, calcium supplementation was not required because his dietary calcium intake was about 1000 mg/d.

### Conclusion

This patient's case underscores the importance of assessing drug-related causes of symptoms in older patients and whether the causative agent is still required. Few drug trials include participants in their 80s or 90s, and given pharmacokinetic and pharmacodynamic changes in older people, little is known about the safety and effectiveness of medications in this patient group. Slow tapering with careful monitoring can help to identify medications that are causing adverse effects as well as medications that are still needed for symptom relief.

A pharmacist and physician, working together with support and interventions from other members of an interprofessional team, can make an important difference in the quality of life of older patients by reassessing their medications to ensure they are safe and effective. In the case of our patient, his low energy, diarrhea, dizziness and falls were severely affecting his quality of life. Three months later, he had more energy, improved appetite, normal bowel function, improved balance and mobility, no dizziness and no further falls.



## References

- Cipolle RD, Strand LM, Morley PC, editors. *Pharmaceutical care practice: the clinician's guide*. 2nd ed. New York (NY): McGraw-Hill; 2004.
- Winslade N, Bajcar J. *Therapeutic thought process algorithm*. Ottawa (ON): National Association of Pharmacy Regulatory Authorities; 1995. Available: [www.napra.org/Content\\_Files/Files/algorithm.pdf](http://www.napra.org/Content_Files/Files/algorithm.pdf) (accessed 2012 Dec. 3).
- Shumway-Cook A, Baldwin M, Polissar N, et al. Predicting the probability of falls in community-dwelling older adults. *Phys Ther* 1997;77:812-9.
- Conradsson M, Lundin-Olsson L, Lindelof N, et al. Berg balance scale: intra-rater test-retest reliability among older people dependent in activities of daily living and living in residential care facilities. *Phys Ther* 2007;87:1155-63.
- Perera S, Mody S, Woodman R, et al. Meaningful change and responsiveness in common physical performance measures in older adults. *J Am Geriatr Soc* 2006;54:743-9.
- Salazar JA, Poon I, Nair M. Clinical consequences of polypharmacy in elderly: expect the unexpected, think the unthinkable. *Expert Opin Drug Saf* 2007;6:695-704.
- Pilotto A, Franceschi M, Vitale D, et al. The prevalence of diarrhea and its association with drug use in elderly outpatients: a multicenter study. *Am J Gastroenterol* 2008;103:2816-23.
- Jacob S, Spinler SA. Hyponatremia associated with selective serotonin-reuptake inhibitors in older adults. *Ann Pharmacother* 2006;40:1618-22.
- Ramakrishnan K, Salinas RC. Peptic ulcer disease. *Am Fam Physician* 2007;76:1005-12.
- Conn HO, Poynard T. Corticosteroids and peptic ulcer: meta-analysis of adverse events during steroid therapy. *J Intern Med* 1994;236:619-32.
- Reimer C, Søndergaard B, Hilsted L, et al. Proton-pump inhibitor therapy induces acid-related symptoms in healthy volunteers after withdrawal of therapy. *Gastroenterology* 2009;137:80-7.
- Molander L, Lovheim H, Norman T, et al. Lower systolic blood pressure is associated with greater mortality in people aged 85 and older. *J Am Geriatr Soc* 2008;56:1853-9.
- Freemantle N, Cleland J, Young P, et al. Beta blockade after myocardial infarction: systematic review and meta regression analysis. *BMJ* 1999;318:1730-7.
- Bangalore S, Steg G, Deedwania P, et al. Beta blocker use and clinical outcomes in stable outpatients with and without coronary artery disease. *JAMA* 2012;308:1340-9.
- Graves T, Hanlon JT, Schmader KE, et al. Adverse events after discontinuing medications in elderly outpatients. *Arch Intern Med* 1997;157:2205-10.
- Pariante A, Dartigues JF, Benichou J, et al. Benzodiazepines and injurious falls in community dwelling elders. *Drugs Aging* 2008; 25:61-70.
- Chen C, Farrell B, Ward N, et al. Stopping benzodiazepines: an interdisciplinary approach at a geriatric day hospital. *Can Pharm J* 2010;143:286-95.
- Bischoff-Ferrari HA, Dawson-Hughes B, Staehelin HB, et al. Fall prevention with supplemental and active forms of vitamin D: a meta-analysis of randomised controlled trials. *BMJ* 2009; 339:b3692.
- Stanbury RM, Graham EM. Systemic corticosteroid therapy — side effects and their management. *Br J Ophthalmol* 1998;82: 704-8.

**Affiliations:** Geriatric Day Hospital of Bruyère Continuing Care (Farrell, Monahan, Thompson), Ottawa, Ont.; C.T. Lamont Primary Health Care Research Centre (Farrell), Bruyère Research Institute, Ottawa, Ont.; Department of Family Medicine (Farrell, Monahan), University of Ottawa, Ottawa, Ont.; School of Pharmacy (Thompson), University of Waterloo, Waterloo, Ont.

**Contributors:** Barbara Farrell and Anne Monahan were the clinicians involved in the care of the patient. Wade Thompson prepared the initial draft of the manuscript and conducted relevant literature searches. All of the authors revised the manuscript critically for important intellectual content and approved the final version submitted for publication.

**Acknowledgements:** The authors thank Ruby Grymonpré, Interprofessional Education Coordinator, University of Manitoba; Lynda Weaver, member of the Quantitative Tools Working Group of the Research and Evaluation Committee, Canadian Interprofessional Health Collaborative; and Karishma Kak, co-op student, University of Waterloo School of Pharmacy, for their help in preparing the instructions and worksheets in Appendices 3B and 3C.

## Resources for clinicians

- Tisdale JE, Miller DA, editors. *Drug-induced diseases: prevention, detection and management*. 2nd ed. Bethesda (MD): American Society of Health System Pharmacists; 2010.
- Alexander GC, Sayla MA, Holmes HM, et al. Prioritizing and stopping prescription medications. *CMAJ* 2006;174:1083-4.
- A practical guide to stopping medicines in older people. *Best Pract J* 2010;27:10-23.
- Hajjar ER, Gray SL, Guay DR, et al. Geriatrics. In: Talbert RL, DiPiro JT, Matzke GR, editors. *Pharmacotherapy: a pathophysiologic approach*. 8th ed. New York (NY): McGraw-Hill; 2011. Available: <http://accesspharmacy.com/content.aspx?aid=7967419>
- Kwan D, Farrell B. Polypharmacy — optimizing medication use in elderly patients. *Pharmacy Practice* 2012;29:20-5.

This article is one of several prepared as part of a collaboration between the Geriatric Day Hospital of Bruyère Continuing Care, *CMAJ*, *Canadian Family Physician* and the *Canadian Pharmacists Journal* to assist clinicians in the prevention and management of polypharmacy when caring for older patients in their practices. The first article appeared in *CMAJ* and is available at [www.cmaj.ca/lookup/doi/10.1503/cmaj.122012](http://www.cmaj.ca/lookup/doi/10.1503/cmaj.122012). The second article appeared in the *Canadian Pharmacists Journal* (2013;146:262-9) and can be found at <http://cph.sagepub.com/content/146/5/262.full>.

| Appendix 3A: History of medication experience                                                                                                                                               |                                   |                        |                                                                                                                                                                        |        |        |        |
|---------------------------------------------------------------------------------------------------------------------------------------------------------------------------------------------|-----------------------------------|------------------------|------------------------------------------------------------------------------------------------------------------------------------------------------------------------|--------|--------|--------|
| Medication                                                                                                                                                                                  | Reason for use (if known)         | Duration (if known)    | Knowledge, efficacy, compliance, goals, safety assessment*                                                                                                             |        |        |        |
| Telmisartan 80 mg/d                                                                                                                                                                         | CAD; MI/angioplasty 15 yr earlier | ?                      | BP, mm Hg                                                                                                                                                              | Day 1  | Day 2  | Day 3  |
|                                                                                                                                                                                             |                                   |                        | • Lying:                                                                                                                                                               | 115/55 | 118/61 | 127/70 |
|                                                                                                                                                                                             |                                   |                        | • Standing:                                                                                                                                                            | 83/42  | 102/54 | 97/64  |
| Metoprolol 50 mg/d                                                                                                                                                                          | CAD; MI/angioplasty 15 yr earlier | 15 yr                  | <ul style="list-style-type: none"> <li>• Reported feeling weak and having little energy</li> <li>• ECG on admission showed sinus bradycardia (52 beats/min)</li> </ul> |        |        |        |
| Escitalopram 10 mg/d                                                                                                                                                                        | Depression                        | ~ 2 mo                 | <ul style="list-style-type: none"> <li>• Stated that medication is helping; appetite improving in last week</li> </ul>                                                 |        |        |        |
| Lorazepam 1 mg at bedtime as needed                                                                                                                                                         | Insomnia                          | Within last several mo | <ul style="list-style-type: none"> <li>• Reported taking medication nightly, but still takes 1.5–2 h to fall asleep; naps up to 6 h during the day</li> </ul>          |        |        |        |
| Tamsulosin CR 0.4 mg at bedtime                                                                                                                                                             | Nocturia                          | ~ 2 yr                 | <ul style="list-style-type: none"> <li>• Stated that urination is easier but nocturia not improved</li> </ul>                                                          |        |        |        |
| Pantoprazole 40 mg twice daily                                                                                                                                                              | GI bleed 7 mo earlier             | 7 mo                   | <ul style="list-style-type: none"> <li>• No current symptoms of ulcer or reflux</li> </ul>                                                                             |        |        |        |
| Prednisone 5 mg twice daily                                                                                                                                                                 | Bullous pemphigoid                | ~ 2 yr                 | <ul style="list-style-type: none"> <li>• Prescribed by dermatologist; symptoms currently controlled</li> </ul>                                                         |        |        |        |
| Loperamide 1 mg as needed                                                                                                                                                                   | Diarrhea                          | ~ 2 mo                 | <ul style="list-style-type: none"> <li>• Reported having diarrhea every 4–5 d; relieved with loperamide</li> </ul>                                                     |        |        |        |
| Note: BP = blood pressure, CAD = coronary artery disease, CR = controlled release, ECG = electrocardiogram, GI = gastrointestinal, MI = myocardial infarction.<br>*No known drug allergies. |                                   |                        |                                                                                                                                                                        |        |        |        |

## Appendix 3B: Identifying drug-related problems and developing an interprofessional medication care plan

Identifying potential drug-related problems is an important part of geriatric assessment. Signs and symptoms can be contributed to by drug therapy, and prescribing cascades can result when signs and symptoms are treated by other drugs, rather than by tapering or removing the causative medication. Medications are sometimes overused in this population, and resulting polypharmacy can affect adherence and increase the risk of adverse events. Many health care providers can contribute to resolving drug-related problems in a variety of ways. In this exercise, you will work with other health care providers to identify potential drug-related problems and to develop action plans for managing and monitoring these problems as a team.

### Instructions

Read the first part of the case description and look at the patient's history of medication experience (Appendix 3A). From what you know about the case, discuss in your group the indication, effectiveness, safety and compliance with each medication. Now look at each symptom or unusual sign: What drugs might be contributing to these? As a group, use the worksheet on the next page to write down the potential drug-related problems, the actions that need to be taken to resolve them, and the monitoring parameters that should be followed to determine the outcome of interventions.

### Questions for group discussion

1. Is there information missing from the case that would help you identify drug-related problems?
2. How did the members of your group decide to organize themselves to complete this task?

### Resources

- Cipolle RD, Strand LM, Morley PC, editors. *Pharmaceutical care practice: the clinician's guide*. 2nd ed. New York (NY): McGraw-Hill; 2004.
- Winslade N, Bajcar J. *Therapeutic thought process algorithm*. Ottawa (ON): National Association of Pharmacy Regulatory Authorities; 1995. Available: [www.napra.org/Content\\_Files/Files/algorithm.pdf](http://www.napra.org/Content_Files/Files/algorithm.pdf) (accessed 2012 Dec. 3).
- E-therapeutics, Canadian Pharmacists Association ([www.pharmacists.ca/index.cfm/function/store/PublicationDetail.cfm?pPub=9](http://www.pharmacists.ca/index.cfm/function/store/PublicationDetail.cfm?pPub=9))
- Lexi-Comp drug interaction tool ([www.lexi.com/](http://www.lexi.com/))
- Creatinine clearance calculation tool ([www.globalrph.com/multiple\\_crcl.htm](http://www.globalrph.com/multiple_crcl.htm))





### **Appendix 3C: Planning interventions – When to do what and who should do it? What challenges might be anticipated?**

Collaboration for interprofessional care encompasses six important competencies: team communication, person-centred care, conflict management, shared decision-making/leadership, team dynamics, and understanding roles and responsibilities. A team approach to patient care can optimize health and wellbeing – particularly in the complex frail older patient. Team members contribute different skill sets, yet there can sometimes be role overlap. A well-functioning team should openly discuss role overlap and decide who will be doing what. So far, our case has focused on drug-related problems. Interventions have focused primarily on medication changes. Yet, many providers can contribute to optimizing symptom management through nonpharmacologic approaches. In this exercise, you will work with other interprofessional team members to plan an intervention timeline for medication changes and to identify nonpharmacologic approaches and action plans for managing and monitoring symptoms that will contribute to resolving drug-related problems.

#### **Instructions**

Review the medication care plan in Box 2. Write down the order in which medication changes can be made. Think about nonpharmacologic approaches that can be used concurrently to manage each sign or symptom (thus potentially affecting medication use) and who can implement and monitor these approaches. Write these down as part of the intervention timeline. If a salient health care professional is not in your group, write down which profession with whom your team would like to consult.

#### **Questions for group discussion**

1. Who should take responsibility for each pharmacologic and nonpharmacologic action in the intervention timeline? Who else should be consulted?
2. Who should be involved in following individual monitoring parameters?
3. Where is there role overlap? How can this be managed to maximize the team's efficiency?
4. Imagine there is a conflict about implementing part of the plan. How could the team handle it? How could conflict have been avoided?
5. Imagine the patient does not agree to an aspect of the plan. How would the team manage the patient's priorities versus their own?

#### **Resource**

- Canadian Interprofessional Health Collaborative ([www.cihc.ca/](http://www.cihc.ca/))

| <b>Intervention Timeline Worksheet</b> |  |
|----------------------------------------|--|
| Week 1                                 |  |
| Week 2                                 |  |
| Week 3                                 |  |
| Week 4                                 |  |
| Week 5                                 |  |
| Week 6                                 |  |
| Week 7                                 |  |
| Week 8                                 |  |
| Week 9                                 |  |
| Week 10                                |  |
| Week 11                                |  |
| Week 12                                |  |

| <b>Appendix 3D: Intervention timeline</b>                       |                                                                                                                                                                                                                                                                                                                                       |
|-----------------------------------------------------------------|---------------------------------------------------------------------------------------------------------------------------------------------------------------------------------------------------------------------------------------------------------------------------------------------------------------------------------------|
| Initial pill burden: 9 pills/d<br>Initial no. of medications: 8 |                                                                                                                                                                                                                                                                                                                                       |
| Week 1                                                          | <ul style="list-style-type: none"> <li>• Start vitamin D 1000 IU/d</li> <li>• Stop lorazepam 1 mg at bedtime</li> <li>• Start lorazepam 0.5 mg at bedtime (when needed)</li> </ul>                                                                                                                                                    |
| Week 2                                                          | <ul style="list-style-type: none"> <li>• Start vitamin B<sub>12</sub> 1000 µg/d</li> <li>• Stop pantoprazole</li> <li>• Start rabeprazole 20 mg/d</li> <li>• Decrease metoprolol dose to 25 mg/d</li> <li>• Stop prednisone 5 mg 2 times/d</li> <li>• Start prednisone 7.5 mg/d</li> </ul>                                            |
| Week 4                                                          | <ul style="list-style-type: none"> <li>• Decrease dose of escitalopram to 5 mg/d</li> <li>• Decrease dose of lorazepam to 0.25 mg at bedtime (when needed)</li> <li>• Increase prednisone dose to 5 mg 2 times/d</li> <li>• Start psyllium 1 capsule/d (increase as needed) with 250 mL water (no longer using loperamide)</li> </ul> |
| Week 6                                                          | <ul style="list-style-type: none"> <li>• Decrease dose of rabeprazole to 10 mg/d</li> <li>• Decrease dose of metoprolol to 12.5 mg/d</li> </ul>                                                                                                                                                                                       |
| Week 7                                                          | <ul style="list-style-type: none"> <li>• Stop lorazepam</li> </ul>                                                                                                                                                                                                                                                                    |
| Week 8                                                          | <ul style="list-style-type: none"> <li>• Stop metoprolol</li> <li>• Stop escitalopram</li> <li>• Decrease dose of telmisartan to 40 mg/d</li> <li>• Stop psyllium capsules</li> <li>• Start psyllium powder 15 mL/d in 250 mL water</li> </ul>                                                                                        |
| Week 10                                                         | <ul style="list-style-type: none"> <li>• Decrease dose of telmisartan to 20 mg/d</li> </ul>                                                                                                                                                                                                                                           |
| Week 11                                                         | <ul style="list-style-type: none"> <li>• Stop rabeprazole</li> </ul>                                                                                                                                                                                                                                                                  |
| Week 12                                                         | <ul style="list-style-type: none"> <li>• No medication changes</li> </ul>                                                                                                                                                                                                                                                             |
| Final pill burden: 7 pills/d<br>Final no. of medications: 6     |                                                                                                                                                                                                                                                                                                                                       |
